# Supplementary material for: The Minderoo-Monaco Commission on Plastics and Human Health
Source: PubMed Central journal article supplement (PMC10038118; doi:10.5334/aogh.4056), 2023-03-21
Supplement: agh-89-1-4056-s1.pdf [file agh-89-1-4056-s1.pdf]

## ABBREVIATIONS AND GLOSSARY

|                   |                                                            |
|-------------------|------------------------------------------------------------|
| ALDFG             | abandoned, lost, or otherwise discarded fishing gear       |
| ATBC              | acetyl tributyl citrate                                    |
| BBP               | butyl benzyl phthalate (also commonly abbreviated as BBzP) |
| BFRs              | brominated flame retardants                                |
| BHT               | butylated hydroxytoluene                                   |
| BPA               | bisphenol A                                                |
| BPF               | bisphenol F                                                |
| BPS               | bisphenol S                                                |
| BTEX              | benzene, toluene, ethylbenzene and xylene                  |
| BUVS              | benzotriazole-type UV stabilizer                           |
| BzP               | benzophenones                                              |
| CHD               | coronary heart disease                                     |
| CO <sub>2</sub>   | carbon dioxide                                             |
| CO <sub>2</sub> e | carbon dioxide equivalent                                  |
| DEHA              | di(2-ethylhexyl) adipate                                   |
| DEHP              | di(2-ethylhexyl) phthalate                                 |
| DINCH             | di-isononyl cyclohexane-1,2-dicarboxylate                  |
| DINP              | di-isononyl phthalate (also commonly abbreviated as DNP)   |
| ECHA              | European Chemicals Agency                                  |
| EDCs              | endocrine disrupting chemicals                             |
| EPA               | Environmental Protection Agency                            |
| EPR               | extended producer responsibility                           |
| EU                | European Union                                             |
| GDP               | gross domestic product                                     |
| GHG               | greenhouse gas                                             |
| GI                | gastrointestinal                                           |
| GNI               | gross national income                                      |
| Gt                | gigaton (1 billion metric tons)                            |
| HBCDD             | hexabromocyclododecane                                     |
| HDPE              | high-density polyethylene                                  |
| Int\$             | international dollar (equivalent to US dollar)             |
| INC               | Intergovernmental Negotiating Committee                    |
| IV                | intravenous                                                |
| LDPE              | low-density polyethylene                                   |
| LMIC/s            | low-and-middle income country/ies                          |
| LNG               | liquified natural gas                                      |
| MNP               | micro- and nano-plastic particles                          |
| MPs               | microplastics                                              |
| Mt                | megaton (1 million metric tons)                            |
| NHANES            | National Health and Nutritional Examination Survey         |
| NHS               | National Health Service                                    |
| NIAS              | non-intentionally added substances                         |
| NO <sub>x</sub>   | oxides of nitrogen                                         |
| NPs               | nanoplastics                                               |

|                 |                                                                                                                                                                                                                               |
|-----------------|-------------------------------------------------------------------------------------------------------------------------------------------------------------------------------------------------------------------------------|
| OECD            | Organisation for Economic Co-operation and Development                                                                                                                                                                        |
| OPEs            | organophosphate esters                                                                                                                                                                                                        |
| OPFRs           | organophosphorus flame retardants                                                                                                                                                                                             |
| OR              | odds ratio                                                                                                                                                                                                                    |
| PA              | polyamide                                                                                                                                                                                                                     |
| PAHs            | polycyclic aromatic hydrocarbons                                                                                                                                                                                              |
| PBBs            | polybrominated biphenyls                                                                                                                                                                                                      |
| PBDEs           | polybrominated diphenyl ethers (also commonly abbreviated as BDE)                                                                                                                                                             |
| PBT             | persistence, bio-accumulation potential and toxicity (or persistent, bioaccumulative and toxic)                                                                                                                               |
| PC              | polycarbonate                                                                                                                                                                                                                 |
| PCBs            | polychlorinated biphenyls                                                                                                                                                                                                     |
| PCDDs           | polychlorinated dibenzo-p-dioxins                                                                                                                                                                                             |
| PCDD/Fs         | polychlorinated dioxins and dibenzofurans                                                                                                                                                                                     |
| PE              | polyethylene                                                                                                                                                                                                                  |
| PET             | polyethylene terephthalate                                                                                                                                                                                                    |
| PFAS            | per- and poly-fluoroalkyl substances                                                                                                                                                                                          |
| Pg              | petagram                                                                                                                                                                                                                      |
| PLA             | polylactic acid                                                                                                                                                                                                               |
| PM              | particulate matter (number after PM indicates size in microns. PM <sub>2.5</sub> are particulates with a diameter of 2.5 micrometers or less and PM <sub>10</sub> are particulates with a diameter of 10 micrometers or less) |
| POPs            | persistent organic pollutants                                                                                                                                                                                                 |
| PP              | polypropylene                                                                                                                                                                                                                 |
| PS              | polystyrene                                                                                                                                                                                                                   |
| PUR             | polyurethane                                                                                                                                                                                                                  |
| PVC             | polyvinyl chloride                                                                                                                                                                                                            |
| REACH           | Registration Evaluation Authorization and Restriction of Chemicals                                                                                                                                                            |
| ROS             | reactive oxygen species                                                                                                                                                                                                       |
| RoW             | rest of world                                                                                                                                                                                                                 |
| SCC             | social cost of carbon                                                                                                                                                                                                         |
| SEJ             | social and environmental justice                                                                                                                                                                                              |
| SO <sub>2</sub> | sulfur dioxide                                                                                                                                                                                                                |
| SO <sub>x</sub> | oxides of sulfur                                                                                                                                                                                                              |
| TRL             | technology readiness level                                                                                                                                                                                                    |
| UN              | United Nations                                                                                                                                                                                                                |
| UNEA            | United Nations Environmental Assembly                                                                                                                                                                                         |
| UNEP            | United Nations Environment Programme                                                                                                                                                                                          |
| UV              | ultraviolet                                                                                                                                                                                                                   |
| VOCs            | volatile organic compounds                                                                                                                                                                                                    |
| VSL             | value per statistical life                                                                                                                                                                                                    |
| WHO             | World Health Organization                                                                                                                                                                                                     |

**Additives** Chemicals that are incorporated into the plastic polymer matrix to impart a wide range of properties such as durability (antioxidants, light stabilizers, heat stabilizers, biocides and flame retardants), strength (glass fibres and carbon fibres), flexibility (plasticizers) and color.

|                                 |                                                                                                                                                                                                                                                                                                                                |
|---------------------------------|--------------------------------------------------------------------------------------------------------------------------------------------------------------------------------------------------------------------------------------------------------------------------------------------------------------------------------|
| Adsorbed chemicals              | Chemicals from the surrounding environment attracted to and accumulating on the surface of a material                                                                                                                                                                                                                          |
| Bioaccumulation                 | Increased concentration of a chemical in a biological organism over time during its lifespan, compared to the chemical's concentration in the surrounding environment.                                                                                                                                                         |
| Biodegradation                  | Breakdown of materials by microorganisms, such as bacteria and fungi, into environmentally acceptable products such as water, carbon dioxide, and biomass.                                                                                                                                                                     |
| Biomagnification                | Increased concentration of a chemical due to environmental and food exposure with increasing trophic level.                                                                                                                                                                                                                    |
| Carbon feedstocks               | Carbon-containing raw materials and/or fuel used in manufacturing products, typically derived from fossil fuels such as coal, gas and oil.                                                                                                                                                                                     |
| Environmental justice community | A neighborhood or community subjected to a disproportionate burden of environmental hazards and/or experiences a significantly reduced quality of life due to environmental harms and risks relative to surrounding or comparative communities.                                                                                |
| Fenceline community             | A neighborhood that is within a distance from a company or industrial project short enough to be directly affected by the noise, odors, chemical emissions, traffic, and operations of the company.                                                                                                                            |
| Macroplastics                   | Typically categorized as plastics >5 mm in size. Includes mesoplastics.                                                                                                                                                                                                                                                        |
| Microplastics                   | Plastic particles <5 mm in size.                                                                                                                                                                                                                                                                                               |
| Monomers                        | Small molecules that can react together or with other monomer molecules to form a larger polymer chain or a three-dimensional network polymer in a process called polymerization.                                                                                                                                              |
| Nanoplastics                    | Plastic particles typically defined either as <1 µm or <100 nm.                                                                                                                                                                                                                                                                |
| Plastic chemicals               | Includes monomers, polymers, chemicals added to assist manufacturing and processing of the plastic materials (processing aids), chemicals added to impart properties to the plastic materials (additives), as well as non-intentionally added substances such as impurities, by-products, breakdown products and contaminants. |
| Plastics                        | Synthetic materials that have the capability of being molded or shaped. They are made of polymers and a number of plastic chemicals.                                                                                                                                                                                           |
| Polymers                        | Natural or synthetic substances composed of very large molecules, called macromolecules, that are multiples of simpler chemical units called monomers.                                                                                                                                                                         |
| Primary microplastics           | Defined by the Organisation for Economic Co-operation and Development (OECD) as manufactured plastic particles smaller than 5 mm in diameter.                                                                                                                                                                                  |
| Ton                             | Metric ton i.e., 1000 kg (2204 lbs - pounds).                                                                                                                                                                                                                                                                                  |
